# Supplementary material
Source: publisher figshare collection journal article supplement (https://acs.figshare.com/ndownloader/files/4082947)
Supplement: Supplementary file 1 [file 4082947]

## **Supporting Information**

### **Kinetic Study on the Coupling of CO<sub>2</sub> and Epoxides Catalyzed by Co(III)**

#### **Complex with an Inter- or Intra-Molecular Nucleophilic Cocatalyst**

Jie Liu, Wei-Min Ren,\* Ye Liu and Xiao-Bing Lu\*

[Lxb-1999@163.com](mailto:Lxb-1999@163.com)

State key laboratory of fine chemicals, Dalian University of Technology, Dalian 116024, China.

*Scheme S1*: Binary and one-component catalysts for CO<sub>2</sub>/epoxides coupling

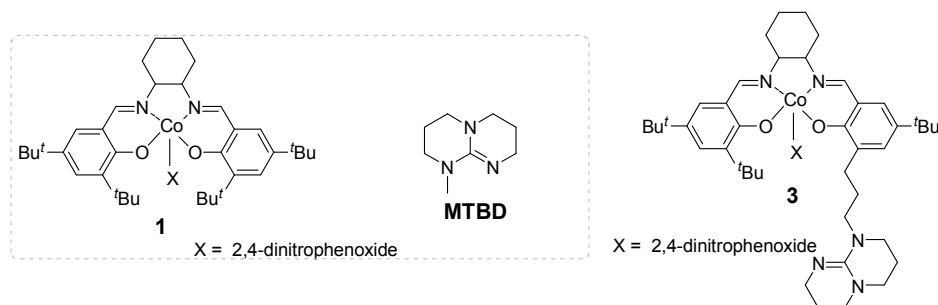

Table S1 Effects of catalyst loading on the initial rate and induction period<sup>a</sup>

| Run | Catal./Cocatal.<br>(molar ratio) | Epoxide/Catal.<br>(molar ratio) | Catalyst concn. <sup>b</sup><br>(mol/L) | Initial rate <sup>c</sup><br>(Abs.×10 <sup>6</sup> /s) | Induction period <sup>d</sup><br>(seconds) |
|-----|----------------------------------|---------------------------------|-----------------------------------------|--------------------------------------------------------|--------------------------------------------|
| 1   | <b>1</b> /MTBD (1/1)             | 1000                            | 0.0142                                  | 281.8                                                  | 0                                          |
| 2   | <b>1</b> /MTBD (1/1)             | 2000                            | 0.0071                                  | 79.6                                                   | 200                                        |
| 3   | <b>1</b> /MTBD (1/1)             | 5000                            | 0.0028                                  | 21.0                                                   | 1200                                       |
| 4   | <b>1</b> /MTBD (1/1)             | 10000                           | 0.0014                                  | 7.5                                                    | 2000                                       |
| 5   | <b>3</b>                         | 2000                            | 0.0071                                  | 210.7                                                  | 0                                          |
| 6   | <b>3</b>                         | 5000                            | 0.0028                                  | 89.3                                                   | 0                                          |
| 7   | <b>3</b>                         | 10000                           | 0.0014                                  | 43.3                                                   | 0                                          |

<sup>a</sup> All reactions were performed in 20 mL neat propylene oxide at 25 °C and 20 bar CO<sub>2</sub> pressure. <sup>b</sup> Based on cobalt complex concentration. <sup>c</sup> Slope of absorption vs time curves calculated for the linear part. <sup>d</sup> Time for initial rate at zero, corresponding to the intersection of the linear part at the time axis.

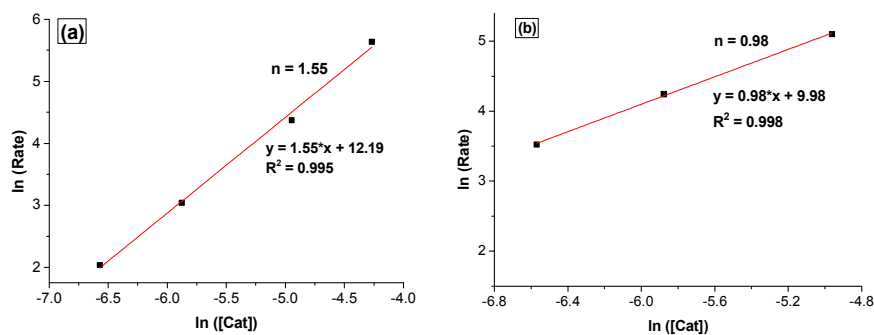

Figure S1: Logarithmic plots of initial rate *versus* catalyst concentration. (a) binary catalyst system of complex **1** and equivalent MTBD, and (b) catalyst **3**.
